# Supplementary material
Source: MDPI journal article supplement (https://www.mdpi.com/1424-2818/14/11/968)
Supplement: s1 [file s1]

**Table S1** Latitude and longitude coordinates and degree of urbanization for 44 study sites

| Site                      | Longitude      | Latitude      | Degrees of urbanization |
|---------------------------|----------------|---------------|-------------------------|
| Yuepu Park                | 121° 25' 25" E | 31° 24' 57" N | High                    |
| Xinglong Greenbelt        | 121° 50' 57" E | 31° 18' 27" N | Low                     |
| Xilin                     | 121° 10' 41" E | 31° 5' 48" N  | Moderate                |
| Wild Animal Park          | 121° 42' 53" E | 31° 3' 27" N  | Moderate                |
| Shutang Road              | 121° 53' 23" E | 30° 55' 24" N | Low                     |
| Shiji Park                | 121° 32' 46" E | 31° 12' 51" N | High                    |
| Shetiankun                | 121° 7' 59" E  | 31° 2' 58" N  | Moderate                |
| Shanghai Botanical Garden | 121° 26' 29" E | 31° 9' 9" N   | High                    |
| Renmin Park               | 121° 28' 4" E  | 31° 14' 4" N  | High                    |
| Qingfeng Orchard          | 121° 46' 29" E | 31° 21' 43" N | Low                     |
| Paotaiwan Forest Park     | 121° 30' 22" E | 31° 23' 39" N | High                    |
| Nanhui wetland            | 121° 58' 21" E | 30° 54' 47" N | Low                     |
| Nanhui Farmland           | 121° 56' 48" E | 30° 57' 32" N | Low                     |
| Minhang Sports Park       | 121° 21' 38" E | 31° 8' 58" N  | High                    |
| Mindong Orchard           | 121° 51' 48" E | 31° 20' 45" N | Low                     |
| Maritime University       | 121° 54' 18" E | 30° 52' 50" N | Moderate                |
| Luoshan                   | 121° 9' 42" E  | 31° 4' 49" N  | Moderate                |
| Lianyou Pond              | 121° 1' 28" E  | 31° 3' 27" N  | Low                     |
| Lanlugang pond            | 120° 59' 3" E  | 31° 5' 11" N  | Low                     |
| Kangjian Park             | 121° 24' 56" E | 31° 9' 58" N  | High                    |
| Kaixin Farmland           | 121° 34' 29" E | 31° 26' 54" N | Low                     |
| Jinhai Park               | 121° 38' 32" E | 31° 15' 42" N | Moderate                |
| Jingxiao                  | 120° 59' 13" E | 31° 3' 24" N  | Low                     |
| Jianghai Farmland         | 121° 49' 4" E  | 31° 21' 54" N | Low                     |
| Huangxing Park            | 121° 31' 41" E | 31° 17' 47" N | High                    |
| Houtan Park               | 121° 27' 55" E | 31° 10' 57" N | High                    |
| Haiwan Park               | 121° 39' 46" E | 30° 51' 55" N | Low                     |
| Guyi Park                 | 121° 18' 35" E | 31° 17' 38" N | High                    |
| Gucun Park                | 121° 21' 50" E | 31° 20' 34" N | Moderate                |
| Gongqing Forest Park      | 121° 32' 30" E | 31° 19' 22" N | Moderate                |
| Gaojia                    | 121° 25' 21" E | 31° 40' 43" N | Low                     |
| Gaodong Park              | 121° 37' 11" E | 31° 19' 51" N | Moderate                |
| Ganju Orchard             | 121° 41' 13" E | 31° 25' 1" N  | Low                     |
| Dongping Forest Park      | 121° 28' 9" E  | 31° 41' 4" N  | Low                     |
| Dongfeng Farmland         | 121° 26' 11" E | 31° 43' 13" N | Low                     |
| Dianshan Wetland          | 120° 54' 5" E  | 31° 5' 7" N   | Low                     |
| Danling Park              | 121° 26' 32" E | 31° 16' 48" N | Moderate                |
| Dalian Wetland            | 121° 59' 54" E | 31° 4' 2" N   | Low                     |
| Chenshan Botanical Garden | 121° 10' 48" E | 31° 4' 25" N  | Moderate                |
| Changfeng Park            | 121° 23' 35" E | 31° 13' 24" N | High                    |
| Binjiang Forest Park      | 121° 31' 10" E | 31° 22' 58" N | High                    |
| Baohu Orchard             | 121° 12' 6" E  | 31° 44' 13" N | Low                     |
| Zhongshan Park            | 121° 24' 59" E | 31° 13' 17" N | High                    |
| Baigang Road              | 121° 15' 19" E | 31° 43' 33" N | Low                     |

**Table S2** Correlation coefficient matrices for 15 landscape variables used to quantify the relationships between anuran communities and the urban environment of 44 wetlands in Shanghai. Landscape matrices as described by McGarigal et. al. [48];

500 m radius

|          | PD       | LPI      | AREA_MN  | FRAC_AM  | PARA_AM  | PROX_MN  | ENN_MN   | CONTAG   | IJI      | CONNECT  | COHESION | PR       | SHDI     | SHEI     | AI       |
|----------|----------|----------|----------|----------|----------|----------|----------|----------|----------|----------|----------|----------|----------|----------|----------|
| PD       | 1        | -0.42439 | -0.72487 | 0.001314 | 0.883806 | -0.39581 | -0.68979 | -0.56507 | 0.387681 | -0.18283 | -0.69787 | 0.509967 | 0.62001  | 0.488047 | -0.8828  |
| LPI      | -0.42439 | 1        | 0.512722 | 0.422277 | -0.62524 | 0.706216 | 0.454709 | 0.85254  | -0.51036 | -0.00992 | 0.802583 | -0.33566 | -0.8349  | -0.85608 | 0.612002 |
| AREA_MN  | -0.72487 | 0.512722 | 1        | -0.15254 | -0.77069 | 0.316661 | 0.680608 | 0.545278 | -0.1276  | -0.038   | 0.54178  | -0.61305 | -0.64723 | -0.49087 | 0.765039 |
| FRAC_AM  | 0.001314 | 0.422277 | -0.15254 | 1        | 0.12893  | 0.509637 | -0.07735 | 0.227697 | -0.653   | 0.086579 | 0.54288  | -0.1563  | -0.33048 | -0.29957 | -0.14534 |
| PARA_AM  | 0.883806 | -0.62524 | -0.77069 | 0.12893  | 1        | -0.39342 | -0.77377 | -0.75743 | 0.358379 | -0.05369 | -0.73391 | 0.420764 | 0.729485 | 0.67405  | -0.99959 |
| PROX_MN  | -0.39581 | 0.706216 | 0.316661 | 0.509637 | -0.39342 | 1        | 0.275103 | 0.63326  | -0.56999 | 0.13189  | 0.622582 | -0.32648 | -0.66317 | -0.65809 | 0.379072 |
| ENN_MN   | -0.68979 | 0.454709 | 0.680608 | -0.07735 | -0.77377 | 0.275103 | 1        | 0.629863 | -0.15685 | -0.06784 | 0.552543 | -0.11184 | -0.50785 | -0.56609 | 0.777964 |
| CONTAG   | -0.56507 | 0.85254  | 0.545278 | 0.227697 | -0.75743 | 0.63326  | 0.629863 | 1        | -0.58116 | -0.0643  | 0.763206 | -0.2078  | -0.90009 | -0.99119 | 0.746651 |
| IJI      | 0.387681 | -0.51036 | -0.1276  | -0.653   | 0.358379 | -0.56999 | -0.15685 | -0.58116 | 1        | -0.07105 | -0.72375 | 0.16278  | 0.573223 | 0.588669 | -0.34707 |
| CONNECT  | -0.18283 | -0.00992 | -0.038   | 0.086579 | -0.05369 | 0.13189  | -0.06784 | -0.0643  | -0.07105 | 1        | 0.143255 | -0.17261 | -0.01739 | 0.075825 | 0.052495 |
| COHESION | -0.69787 | 0.802583 | 0.54178  | 0.54288  | -0.73391 | 0.622582 | 0.552543 | 0.763206 | -0.72375 | 0.143255 | 1        | -0.44617 | -0.80765 | -0.73911 | 0.722992 |
| PR       | 0.509967 | -0.33566 | -0.61305 | -0.1563  | 0.420764 | -0.32648 | -0.11184 | -0.2078  | 0.16278  | -0.17261 | -0.44617 | 1        | 0.593709 | 0.206982 | -0.40237 |
| SHDI     | 0.62001  | -0.8349  | -0.64723 | -0.33048 | 0.729485 | -0.66317 | -0.50785 | -0.90009 | 0.573223 | -0.01739 | -0.80765 | 0.593709 | 1        | 0.90768  | -0.71043 |
| SHEI     | 0.488047 | -0.85608 | -0.49087 | -0.29957 | 0.67405  | -0.65809 | -0.56609 | -0.99119 | 0.588669 | 0.075825 | -0.73911 | 0.206982 | 0.90768  | 1        | -0.66065 |
| AI       | -0.8828  | 0.612002 | 0.765039 | -0.14534 | -0.99959 | 0.379072 | 0.777964 | 0.746651 | -0.34707 | 0.052495 | 0.722992 | -0.40237 | -0.71043 | -0.66065 | 1        |

## 1000 m radius

|          | PD       | LPI      | AREA_MN  | FRAC_AM  | PARA_AM  | PROX_MN  | ENN_MN   | CONTAG   | IJI      | CONNECT  | COHESION | PR       | SHDI     | SHEI     | AI       |
|----------|----------|----------|----------|----------|----------|----------|----------|----------|----------|----------|----------|----------|----------|----------|----------|
| PD       | 1        | -0.37283 | -0.59165 | -0.22187 | 0.855489 | -0.46737 | -0.76785 | -0.5559  | 0.481361 | -0.44653 | -0.72624 | 0.420827 | 0.536146 | 0.411804 | -0.85042 |
| LPI      | -0.37283 | 1        | 0.361047 | 0.445446 | -0.49102 | 0.743005 | 0.251829 | 0.719483 | -0.54816 | 0.317727 | 0.713586 | -0.23428 | -0.57771 | -0.66125 | 0.483464 |
| AREA_MN  | -0.59165 | 0.361047 | 1        | -0.10544 | -0.71514 | 0.226897 | 0.675387 | 0.308287 | -0.30529 | 0.73766  | 0.439259 | -0.4246  | -0.37931 | -0.15673 | 0.711453 |
| FRAC_AM  | -0.22187 | 0.445446 | -0.10544 | 1        | 0.09366  | 0.762873 | -0.13039 | 0.592946 | -0.73396 | -0.2909  | 0.674854 | -0.4437  | -0.73291 | -0.72416 | -0.10915 |
| PARA_AM  | 0.855489 | -0.49102 | -0.71514 | 0.09366  | 1        | -0.30078 | -0.8179  | -0.52429 | 0.328987 | -0.65485 | -0.63282 | 0.239372 | 0.369168 | 0.309319 | -0.99979 |
| PROX_MN  | -0.46737 | 0.743005 | 0.226897 | 0.762873 | -0.30078 | 1        | 0.167832 | 0.701873 | -0.74257 | 0.024429 | 0.767078 | -0.47919 | -0.75545 | -0.72794 | 0.287493 |
| ENN_MN   | -0.76785 | 0.251829 | 0.675387 | -0.13039 | -0.8179  | 0.167832 | 1        | 0.363339 | -0.15734 | 0.562971 | 0.455529 | -0.04919 | -0.1725  | -0.17937 | 0.821392 |
| CONTAG   | -0.5559  | 0.719483 | 0.308287 | 0.592946 | -0.52429 | 0.701873 | 0.363339 | 1        | -0.77974 | 0.249424 | 0.822584 | -0.22866 | -0.79731 | -0.96797 | 0.513472 |
| IJI      | 0.481361 | -0.54816 | -0.30529 | -0.73396 | 0.328987 | -0.74257 | -0.15734 | -0.77974 | 1        | -0.11916 | -0.79739 | 0.426536 | 0.77868  | 0.785569 | -0.31578 |
| CONNECT  | -0.44653 | 0.317727 | 0.73766  | -0.2909  | -0.65485 | 0.024429 | 0.562971 | 0.249424 | -0.11916 | 1        | 0.307322 | -0.12133 | -0.14714 | -0.08192 | 0.656141 |
| COHESION | -0.72624 | 0.713586 | 0.439259 | 0.674854 | -0.63282 | 0.767078 | 0.455529 | 0.822584 | -0.79739 | 0.307322 | 1        | -0.47052 | -0.79656 | -0.76407 | 0.621402 |
| PR       | 0.420827 | -0.23428 | -0.4246  | -0.4437  | 0.239372 | -0.47919 | -0.04919 | -0.22866 | 0.426536 | -0.12133 | -0.47052 | 1        | 0.747776 | 0.267292 | -0.22231 |
| SHDI     | 0.536146 | -0.57771 | -0.37931 | -0.73291 | 0.369168 | -0.75545 | -0.1725  | -0.79731 | 0.77868  | -0.14714 | -0.79656 | 0.747776 | 1        | 0.835351 | -0.3505  |
| SHEI     | 0.411804 | -0.66125 | -0.15673 | -0.72416 | 0.309319 | -0.72794 | -0.17937 | -0.96797 | 0.785569 | -0.08192 | -0.76407 | 0.267292 | 0.835351 | 1        | -0.29605 |
| AI       | -0.85042 | 0.483464 | 0.711453 | -0.10915 | -0.99979 | 0.287493 | 0.821392 | 0.513472 | -0.31578 | 0.656141 | 0.621402 | -0.22231 | -0.3505  | -0.29605 | 1        |

## 1500 m radius

|          | PD       | LPI      | AREA_MN  | FRAC_AM  | PARA_AM  | PROX_MN  | ENN_MN   | CONTAG   | IJI      | CONNECT  | COHESION | PR       | SHDI     | SHEI     | AI       |
|----------|----------|----------|----------|----------|----------|----------|----------|----------|----------|----------|----------|----------|----------|----------|----------|
| PD       | 1        | -0.44188 | -0.56578 | -0.23244 | 0.820745 | -0.46047 | -0.77299 | -0.57802 | 0.434787 | -0.43143 | -0.71725 | 0.404571 | 0.507802 | 0.415139 | -0.81567 |
| LPI      | -0.44188 | 1        | 0.237897 | 0.492141 | -0.42828 | 0.708484 | 0.233001 | 0.793866 | -0.58751 | 0.268909 | 0.728774 | -0.32271 | -0.63112 | -0.72911 | 0.420384 |
| AREA_MN  | -0.56578 | 0.237897 | 1        | -0.15158 | -0.71939 | 0.151684 | 0.768099 | 0.210949 | -0.21706 | 0.844233 | 0.384074 | -0.41065 | -0.29387 | -0.0321  | 0.716201 |
| FRAC_AM  | -0.23244 | 0.492141 | -0.15158 | 1        | 0.19111  | 0.8016   | -0.16152 | 0.723017 | -0.81173 | -0.34795 | 0.710957 | -0.51197 | -0.79394 | -0.85912 | -0.20379 |
| PARA_AM  | 0.820745 | -0.42828 | -0.71939 | 0.19111  | 1        | -0.15814 | -0.83062 | -0.40548 | 0.17707  | -0.73073 | -0.51079 | 0.166707 | 0.227027 | 0.150745 | -0.99987 |
| PROX_MN  | -0.46047 | 0.708484 | 0.151684 | 0.8016   | -0.15814 | 1        | 0.151227 | 0.77974  | -0.78773 | -0.07186 | 0.74346  | -0.52619 | -0.78537 | -0.81686 | 0.146779 |
| ENN_MN   | -0.77299 | 0.233001 | 0.768099 | -0.16152 | -0.83062 | 0.151227 | 1        | 0.266496 | -0.08738 | 0.676502 | 0.404034 | -0.14134 | -0.1506  | -0.05857 | 0.831236 |
| CONTAG   | -0.57802 | 0.793866 | 0.210949 | 0.723017 | -0.40548 | 0.77974  | 0.266496 | 1        | -0.84054 | 0.139686 | 0.878503 | -0.39463 | -0.81804 | -0.96076 | 0.39503  |
| IJI      | 0.434787 | -0.58751 | -0.21706 | -0.81173 | 0.17707  | -0.78773 | -0.08738 | -0.84054 | 1        | -0.03084 | -0.8055  | 0.473558 | 0.791419 | 0.85403  | -0.16573 |
| CONNECT  | -0.43143 | 0.268909 | 0.844233 | -0.34795 | -0.73073 | -0.07186 | 0.676502 | 0.139686 | -0.03084 | 1        | 0.271212 | -0.10319 | -0.06166 | 0.072511 | 0.731772 |
| COHESION | -0.71725 | 0.728774 | 0.384074 | 0.710957 | -0.51079 | 0.74346  | 0.404034 | 0.878503 | -0.8055  | 0.271212 | 1        | -0.55067 | -0.8261  | -0.81882 | 0.49986  |
| PR       | 0.404571 | -0.32271 | -0.41065 | -0.51197 | 0.166707 | -0.52619 | -0.14134 | -0.39463 | 0.473558 | -0.10319 | -0.55067 | 1        | 0.837354 | 0.450603 | -0.1521  |
| SHDI     | 0.507802 | -0.63112 | -0.29387 | -0.79394 | 0.227027 | -0.78537 | -0.1506  | -0.81804 | 0.791419 | -0.06166 | -0.8261  | 0.837354 | 1        | 0.861283 | -0.2115  |
| SHEI     | 0.415139 | -0.72911 | -0.0321  | -0.85912 | 0.150745 | -0.81686 | -0.05857 | -0.96076 | 0.85403  | 0.072511 | -0.81882 | 0.450603 | 0.861283 | 1        | -0.13863 |
| AI       | -0.81567 | 0.420384 | 0.716201 | -0.20379 | -0.99987 | 0.146779 | 0.831236 | 0.39503  | -0.16573 | 0.731772 | 0.49986  | -0.1521  | -0.2115  | -0.13863 | 1        |

## 2000 m radius

|          | PD       | LPI      | AREA_MN  | FRAC_AM  | PARA_AM  | PROX_MN  | ENN_MN   | CONTAG   | IJI      | CONNECT  | COHESION | PR       | SHDI     | SHEI     | AI       |
|----------|----------|----------|----------|----------|----------|----------|----------|----------|----------|----------|----------|----------|----------|----------|----------|
| PD       | 1        | -0.38914 | -0.57628 | -0.07356 | 0.829052 | -0.35764 | -0.8476  | -0.45406 | 0.327895 | -0.50789 | -0.60895 | 0.319763 | 0.41562  | 0.311425 | -0.82551 |
| LPI      | -0.38914 | 1        | 0.240009 | 0.390229 | -0.44485 | 0.63216  | 0.255966 | 0.752507 | -0.57171 | 0.404103 | 0.699882 | -0.08342 | -0.57755 | -0.68427 | 0.439369 |
| AREA_MN  | -0.57628 | 0.240009 | 1        | -0.20901 | -0.70768 | 0.129143 | 0.693839 | 0.2163   | -0.19962 | 0.835743 | 0.340764 | -0.36959 | -0.26273 | -0.07411 | 0.704984 |
| FRAC_AM  | -0.07356 | 0.390229 | -0.20901 | 1        | 0.303119 | 0.81324  | -0.1488  | 0.691241 | -0.82203 | -0.37485 | 0.6997   | -0.37439 | -0.78151 | -0.81513 | -0.31244 |
| PARA_AM  | 0.829052 | -0.44485 | -0.70768 | 0.303119 | 1        | -0.07257 | -0.83049 | -0.33818 | 0.107841 | -0.79443 | -0.42058 | 0.034648 | 0.149744 | 0.126299 | -0.99993 |
| PROX_MN  | -0.35764 | 0.63216  | 0.129143 | 0.81324  | -0.07257 | 1        | 0.193747 | 0.750823 | -0.78141 | -0.0418  | 0.765023 | -0.4415  | -0.81394 | -0.79543 | 0.063417 |
| ENN_MN   | -0.8476  | 0.255966 | 0.693839 | -0.1488  | -0.83049 | 0.193747 | 1        | 0.311259 | -0.12988 | 0.589539 | 0.407056 | -0.1166  | -0.1926  | -0.14982 | 0.829641 |
| CONTAG   | -0.45406 | 0.752507 | 0.2163   | 0.691241 | -0.33818 | 0.750823 | 0.311259 | 1        | -0.87834 | 0.2222   | 0.871396 | -0.16967 | -0.82216 | -0.97373 | 0.329761 |
| IJI      | 0.327895 | -0.57171 | -0.19962 | -0.82203 | 0.107841 | -0.78141 | -0.12988 | -0.87834 | 1        | -0.08146 | -0.82868 | 0.2855   | 0.806545 | 0.897679 | -0.09895 |
| CONNECT  | -0.50789 | 0.404103 | 0.835743 | -0.37485 | -0.79443 | -0.0418  | 0.589539 | 0.2222   | -0.08146 | 1        | 0.27698  | -0.04252 | -0.08655 | -0.04214 | 0.794506 |
| COHESION | -0.60895 | 0.699882 | 0.340764 | 0.6997   | -0.42058 | 0.765023 | 0.407056 | 0.871396 | -0.82868 | 0.27698  | 1        | -0.38944 | -0.83908 | -0.83582 | 0.411686 |
| PR       | 0.319763 | -0.08342 | -0.36959 | -0.37439 | 0.034648 | -0.4415  | -0.1166  | -0.16967 | 0.2855   | -0.04252 | -0.38944 | 1        | 0.682315 | 0.23251  | -0.02515 |
| SHDI     | 0.41562  | -0.57755 | -0.26273 | -0.78151 | 0.149744 | -0.81394 | -0.1926  | -0.82216 | 0.806545 | -0.08655 | -0.83908 | 0.682315 | 1        | 0.865802 | -0.13792 |
| SHEI     | 0.311425 | -0.68427 | -0.07411 | -0.81513 | 0.126299 | -0.79543 | -0.14982 | -0.97373 | 0.897679 | -0.04214 | -0.83582 | 0.23251  | 0.865802 | 1        | -0.11696 |
| AI       | -0.82551 | 0.439369 | 0.704984 | -0.31244 | -0.99993 | 0.063417 | 0.829641 | 0.329761 | -0.09895 | 0.794506 | 0.411686 | -0.02515 | -0.13792 | -0.11696 | 1        |

**Table S3.** Correlation coefficient matrices for 8 independent landscape variables at different spatial scales.

| <b>500 m radius</b>  | <b>IJI</b> | <b>CONNECT</b> | <b>PR</b>      | <b>SHEI</b> |
|----------------------|------------|----------------|----------------|-------------|
| ENN_MN               | -0.157     | -0.068         | -0.112         | -0.566      |
| IJI                  |            | -0.071         | 0.163          | 0.589       |
| CONNECT              |            |                | -0.173         | 0.076       |
| PR                   |            |                |                | 0.207       |
| <b>1000 m radius</b> | <b>LPI</b> | <b>AREA_MN</b> | <b>IJI</b>     | <b>PR</b>   |
| PD                   | -0.373     | -0.592         | 0.481          | 0.421       |
| LPI                  |            | 0.361          | -0.548         | -0.234      |
| AREA_MN              |            |                | -0.305         | -0.425      |
| IJI                  |            |                |                | 0.427       |
| <b>1500 m radius</b> | <b>LPI</b> | <b>AREA_MN</b> | <b>IJI</b>     | <b>PR</b>   |
| PD                   | -0.442     | -0.566         | 0.435          | 0.405       |
| LPI                  |            | 0.238          | -0.588         | -0.323      |
| AREA_MN              |            |                | -0.217         | -0.411      |
| IJI                  |            |                |                | 0.474       |
| <b>2000 m radius</b> | <b>LPI</b> | <b>IJI</b>     | <b>CONNECT</b> | <b>PR</b>   |
| PD                   | -0.389     | 0.328          | -0.508         | 0.320       |
| LPI                  |            | -0.572         | 0.404          | -0.083      |
| IJI                  |            |                | -0.081         | 0.285       |
| CONNECT              |            |                |                | -0.043      |

**Table S4.** The best models ( $\Delta i \leq 2$ ) examining relationships between multi-scale landscape variables and the relative abundances of five anuran species, total anuran relative abundance and anuran species richness in 44 urban ponds in Shanghai. The best models predicting *P. nigromaculatus* are shown in Table 4a; the best models predicting *F. multistriata* are shown in Table 4b; the best models predicting *M. fissipes* are shown in Table 4c; the best models predicting *B. gargarizans* are shown in Table 4d; the best models predicting *P. plancyi* are shown in Table 4e; the best models predicting total anuran abundance are shown in Table 4f; the best models predicting anuran species richness are shown in Table 4g;.

**Table 4. a.**

| Scales | Model                                              | AICc  | $\Delta i$ | Wi          | $R^2_{adj}$ |
|--------|----------------------------------------------------|-------|------------|-------------|-------------|
| 500 m  | PR                                                 | 126.2 | 0.00       | 0.14        | 0.07        |
|        | IJI+PR                                             | 126.3 | 0.11       | 0.13        | 0.09        |
|        | IJI                                                | 127.3 | 1.16       | 0.08        | 0.04        |
|        | ENN_MN+IJI+PR                                      | 127.3 | 1.17       | 0.08        | 0.10        |
|        | ENN_MN+PR                                          | 127.7 | 1.50       | 0.07        | 0.06        |
|        | <b>Summed Akaike weight (<math>\sum wi</math>)</b> |       |            | <b>0.50</b> |             |
| 1000 m | AREA_MN+IJI+PR                                     | 124.5 | 0          | 0.09        | 0.16        |
|        | AREA_MN+PR                                         | 124.6 | 0.08       | 0.08        | 0.13        |
|        | PR                                                 | 125.2 | 0.76       | 0.06        | 0.09        |
|        | IJI+PR                                             | 126   | 1.57       | 0.04        | 0.1         |
|        | IJI                                                | 126.2 | 1.69       | 0.03        | 0.07        |
|        | <b>Summed Akaike weight (<math>\sum wi</math>)</b> |       |            | <b>0.30</b> |             |
| 1500 m | AREA_MN+PR                                         | 124.6 | 0          | 0.14        | 0.13        |
|        | AREA_MN+PR+IJI                                     | 125.3 | 0.68       | 0.1         | 0.15        |
|        | PR                                                 | 125.3 | 0.73       | 0.1         | 0.09        |
|        | AREA_MN+LPI+PR                                     | 125.9 | 1.26       | 0.07        | 0.13        |
|        | IJI                                                | 125.9 | 1.27       | 0.07        | 0.08        |
|        | IJI+PR                                             | 126.1 | 1.55       | 0.07        | 0.1         |
| 2000 m | <b>Summed Akaike weight (<math>\sum wi</math>)</b> |       |            | <b>0.55</b> |             |
|        | PR                                                 | 125.4 | 0          | 0.14        | 0.09        |
|        | PR-LPI                                             | 125.8 | 0.36       | 0.11        | 0.11        |
|        | IJI+PR                                             | 126.4 | 0.96       | 0.08        | 0.09        |
|        | PR-LPI-PD                                          | 126.7 | 1.28       | 0.07        | 0.12        |
|        | PR-LPI+CONNECT                                     | 126.9 | 1.49       | 0.06        | 0.11        |
|        | <b>Summed Akaike weight (<math>\sum wi</math>)</b> |       |            | <b>0.46</b> |             |

**Table 4. b.**

| Scales | Model                                              | AICc  | $\Delta i$ | Wi          | $R^2_{adj}$ |
|--------|----------------------------------------------------|-------|------------|-------------|-------------|
| 500 m  | CONNECT+ENN_MN+IJI                                 | 122.1 | 0.00       | 0.19        | 0.20        |
|        | ENN_MN+IJI                                         | 122.5 | 0.44       | 0.16        | 0.17        |
|        | ENN_MN+IJI+PR                                      | 124.1 | 1.97       | 0.07        | 0.17        |
|        | <b>Summed Akaike weight (<math>\sum wi</math>)</b> |       |            | <b>0.42</b> |             |
| 1000 m | AREA_MN+PR+IJI                                     | 117.2 | 0.00       | 0.39        | 0.29        |
|        | AREA_MN+IJI                                        | 119.1 | 1.9        | 0.15        | 0.23        |
|        | <b>Summed Akaike weight (<math>\sum wi</math>)</b> |       |            | <b>0.54</b> |             |
| 1500 m | AREA_MN+PR-LPI                                     | 112.8 | 0.00       | 0.29        | 0.36        |
|        | AREA_MN+PR+IJI                                     | 113.2 | 0.35       | 0.24        | 0.35        |
|        | AREA_MN+IJI-LPI+PR                                 | 114.4 | 1.53       | 0.13        | 0.36        |
|        | AREA_MN+PR                                         | 114.5 | 1.63       | 0.13        | 0.31        |
| 2000 m | <b>Summed Akaike weight (<math>\sum wi</math>)</b> |       |            | <b>0.79</b> |             |
|        | CONNECT-LPI+PR                                     | 111.7 | 0.00       | <b>0.46</b> | 0.37        |

Table 4. c.

| Scales | Model                                              | AICc  | $\Delta i$ | Wi          | R <sup>2</sup> <sub>adj</sub> |
|--------|----------------------------------------------------|-------|------------|-------------|-------------------------------|
| 500 m  | ENN_MN                                             | 128.0 | 0.00       | 0.10        | 0.03                          |
|        | IJI                                                | 128.4 | 0.40       | 0.08        | 0.02                          |
|        | CONNECT-ENN_MN                                     | 128.4 | 0.44       | 0.08        | 0.05                          |
|        | CONNECT                                            | 128.9 | 0.86       | 0.06        | 0.01                          |
|        | ENN_MN+IJI                                         | 128.9 | 0.91       | 0.06        | 0.04                          |
|        | PR                                                 | 129.2 | 0.19       | 0.05        | 0.00                          |
|        | SHEI                                               | 129.4 | 1.36       | 0.05        | 0.00                          |
|        | CONNECT+IJI                                        | 129.4 | 1.41       | 0.05        | 0.03                          |
|        | ENN_MN+PR                                          | 129.5 | 1.46       | 0.04        | 0.02                          |
|        | CONNECT-ENN_MN+IJI                                 | 129.7 | 1.68       | 0.04        | 0.05                          |
|        | CONNECT+SHEI                                       | 129.9 | 1.93       | 0.03        | 0.01                          |
|        | IJI+PR                                             | 130.0 | 1.97       | 0.03        | 0.01                          |
| 1000 m | <i>Summed Akaike weight (<math>\sum wi</math>)</i> |       |            | <b>0.67</b> |                               |
|        | PD                                                 | 125.9 | 0.00       | 0.17        | 0.10                          |
|        | IJI                                                | 126.8 | 0.90       | 0.11        | 0.06                          |
|        | IJI+PD                                             | 127   | 1.11       | 0.10        | 0.80                          |
|        | <i>Summed Akaike weight (<math>\sum wi</math>)</i> |       |            | <b>0.38</b> |                               |
| 1500 m | PD                                                 | 127.7 | 0.00       | 0.13        | 0.04                          |
|        | IJI                                                | 128.1 | 0.36       | 0.11        | 0.03                          |
|        | PR                                                 | 128.8 | 1.04       | 0.08        | 0.01                          |
|        | LPI                                                | 129.1 | 1.39       | 0.07        | 0.01                          |
|        | IJI+PD                                             | 129.4 | 1.66       | 0.06        | 0.03                          |
|        | AREA_MN                                            | 129.6 | 1.92       | 0.05        | 0.00                          |
|        | PD+PR                                              | 129.7 | 1.95       | 0.05        | 0.02                          |
| 2000 m | <i>Summed Akaike weight (<math>\sum wi</math>)</i> |       |            | <b>0.55</b> |                               |
|        | PD                                                 | 125.9 | 0.00       | 0.15        | 0.08                          |
|        | IJI+PD                                             | 126.3 | 0.40       | 0.12        | 0.10                          |
|        | IJI                                                | 126.5 | 0.62       | 0.11        | 0.06                          |
|        | PD-LPI                                             | 127.6 | 1.77       | 0.06        | 0.07                          |
|        | <i>Summed Akaike weight (<math>\sum wi</math>)</i> |       |            | <b>0.44</b> |                               |

Table 4. d.

| Scales | Model                                              | AICc  | $\Delta i$ | Wi          | R <sup>2</sup> <sub>adj</sub> |
|--------|----------------------------------------------------|-------|------------|-------------|-------------------------------|
| 500 m  | PR                                                 | 123.3 | 0.00       | <b>0.32</b> | 0.13                          |
| 1000 m | PR                                                 | 123.1 | 0.00       | <b>0.28</b> | 0.14                          |
| 1500 m | PR                                                 | 119.6 | 0.00       | 0.32        | 0.20                          |
|        | FLPI+PR                                            | 121.6 | 1.93       | 0.12        | 0.19                          |
|        | <i>Summed Akaike weight (<math>\sum wi</math>)</i> |       |            | <b>0.44</b> |                               |
| 2000 m | PR                                                 | 120.8 | 0.00       | 0.28        | 0.18                          |
|        | PR-LPI                                             | 122.5 | 1.62       | 0.12        | 0.17                          |
|        | IJI+PR                                             | 123.1 | 1.63       | 0.12        | 0.17                          |
|        | <i>Summed Akaike weight (<math>\sum wi</math>)</i> |       |            | <b>0.52</b> |                               |

Table 4. e.

| Scales | Model        | AICc  | $\Delta i$ | Wi   | R <sup>2</sup> <sub>adj</sub> |
|--------|--------------|-------|------------|------|-------------------------------|
| 500 m  | CONNECT+SHEI | 124.9 | 0.00       | 0.16 | 0.13                          |
|        | SHEI         | 125.6 | 0.76       | 0.11 | 0.08                          |



|        |                                                      |       |      |             |      |
|--------|------------------------------------------------------|-------|------|-------------|------|
|        | CONNECT+IJI                                          | 126.2 | 1.30 | 0.08        | 0.10 |
|        | CONNECT+PR+SHEI                                      | 126.7 | 1.82 | 0.06        | 0.12 |
|        | <i>Summed Akaike weight (<math>\Sigma wi</math>)</i> |       |      | <b>0.41</b> |      |
| 1000 m | IJI                                                  | 127.4 | 0.00 | <b>0.21</b> | 0.04 |
|        | LPI                                                  | 126.8 | 0.00 | 0.15        | 0.06 |
|        | IJI                                                  | 127.1 | 0.21 | 0.14        | 0.05 |
| 1500 m | IJI-LPI                                              | 128.4 | 1.57 | 0.07        | 0.05 |
|        | PD                                                   | 128.6 | 1.79 | 0.06        | 0.02 |
|        | <i>Summed Akaike weight (<math>\Sigma wi</math>)</i> |       |      | <b>0.42</b> |      |
| 2000 m | LPI                                                  | 123.5 | 0.00 | <b>0.25</b> | 0.13 |

Table 4. f.

| Scales | Model                                                | AICc  | $\Delta i$ | Wi          | R <sup>2</sup> <sub>adj</sub> |
|--------|------------------------------------------------------|-------|------------|-------------|-------------------------------|
|        | IJI+PR                                               | 120.9 | 0.00       | 0.25        | 0.20                          |
| 500 m  | IJI                                                  | 122.3 | 1.36       | 0.13        | 0.15                          |
|        | ENN_MN+IJI+PR                                        | 122.7 | 1.80       | 0.10        | 0.19                          |
|        | <i>Summed Akaike weight (<math>\Sigma wi</math>)</i> |       |            | <b>0.48</b> |                               |
|        | AREA_MN+IJI+PR                                       | 116.9 | 0.00       | 0.27        | 0.29                          |
| 1000 m | IJI                                                  | 118.8 | 1.96       | 0.1         | 0.21                          |
|        | IJI+PR                                               | 118.8 | 1.96       | 0.1         | 0.24                          |
|        | <i>Summed Akaike weight (<math>\Sigma wi</math>)</i> |       |            | <b>0.47</b> |                               |
|        | AREA_MN-LPI+PR                                       | 116.7 | 0.00       | 0.13        | 0.3.0                         |
|        | AREA_MN+IJI-LPI+PR                                   | 116.8 | 0.14       | 0.11        | 0.32                          |
|        | AREA_MN+IJI+PR                                       | 117.1 | 0.37       | 0.11        | 0.30                          |
| 1500 m | IJI+PR                                               | 117.8 | 1.06       | 0.07        | 0.26                          |
|        | IJI                                                  | 117.8 | 1.09       | 0.07        | 0.23                          |
|        | IJI-LPI                                              | 118.1 | 1.39       | 0.06        | 0.25                          |
|        | IJI-LPI+PR                                           | 118.3 | 1.65       | 0.06        | 0.27                          |
|        | PR-LPI                                               | 118.4 | 1.68       | 0.05        | 0.25                          |
|        | <i>Summed Akaike weight (<math>\Sigma wi</math>)</i> |       |            | <b>0.66</b> |                               |
|        | CONNECT-LPI+PR                                       | 115.3 | 0.00       | 0.17        | 0.32                          |
|        | CONNECT-LPI+PR+PR                                    | 116.3 | 1.03       | 0.10        | 0.33                          |
|        | CONNECT-LPI+IJI                                      | 116.4 | 1.12       | 0.10        | 0.3                           |
| 2000 m | IJI-LPI                                              | 116.6 | 1.36       | 0.09        | 0.28                          |
|        | IJI-LPI+PR                                           | 117.0 | 1.70       | 0.07        | 0.29                          |
|        | CONNECT-LPI                                          | 117.1 | 1.81       | 0.06        | 0.28                          |
|        | PR-LPI                                               | 117.1 | 1.85       | 0.06        | 0.27                          |
|        | <i>Summed Akaike weight (<math>\Sigma wi</math>)</i> |       |            | <b>0.65</b> |                               |

Table 4. g.

| Scales | Model                                                | AICc  | $\Delta i$ | Wi          | R <sup>2</sup> <sub>adj</sub> |
|--------|------------------------------------------------------|-------|------------|-------------|-------------------------------|
|        | IJI+PR                                               | 121.8 | 0.00       | 0.21        | 0.18                          |
| 500 m  | IJI+PR-SHEI                                          | 122.8 | 0.95       | 0.13        | 0.19                          |
|        | IJI                                                  | 122.8 | 0.98       | 0.12        | 0.14                          |
|        | <i>Summed Akaike weight (<math>\Sigma wi</math>)</i> |       |            | <b>0.46</b> |                               |
|        | IJI+PR                                               | 120.7 | 0.00       | 0.22        | 0.21                          |
| 1000 m | IJI                                                  | 121.4 | 0.74       | 0.15        | 0.16                          |
|        | <i>Summed Akaike weight (<math>\Sigma wi</math>)</i> |       |            | <b>0.37</b> |                               |
| 1500 m | IJI                                                  | 119.4 | 0.00       | 0.26        | 0.20                          |
|        | IJI+PR                                               | 120.4 | 1.02       | 0.15        | 0.21                          |

|                                                     |                                                     |       |                    |                    |      |
|-----------------------------------------------------|-----------------------------------------------------|-------|--------------------|--------------------|------|
| <i>Summed Akaike weight (<math>\sum w_i</math>)</i> |                                                     |       | <b><i>0.41</i></b> |                    |      |
| 2000 m                                              | IJI                                                 | 120.3 | 0.00               | 0.25               | 0.19 |
|                                                     | IJI+PR                                              | 121.2 | 0.91               | 0.16               | 0.20 |
|                                                     | IJI+PD                                              | 122.3 | 1.97               | 0.09               | 0.17 |
|                                                     | <i>Summed Akaike weight (<math>\sum w_i</math>)</i> |       |                    | <b><i>0.50</i></b> |      |

**Table S5.** Model-averaged coefficients and 95% confidence intervals showing the direction relative magnitude of the effects of landscape variables on anuran relative abundance, and species at different spatial scales in urban landscapes in Shanghai. All possible models were estimated, using generalized linear modelling. Each coefficient was model-averaged across estimates from all models containing that coefficient. Bold font indicates  $p < 0.05$ .

| Species                  | Variable | Coefficient | SE   | z value | P           |
|--------------------------|----------|-------------|------|---------|-------------|
| 500m                     |          |             |      |         |             |
| <i>P. nigromaculatus</i> | PR       | 0.29        | 0.14 | 1.91    | 0.05        |
|                          | IJI      | 0.23        | 0.14 | 1.54    | 0.12        |
|                          | ENN_MN   | 0.15        | 0.14 | 1.02    | 0.30        |
| <i>F. multistriata</i>   | CONNECT  | -0.29       | 0.13 | 1.62    | 0.10        |
|                          | ENN_MN   | 0.30        | 0.13 | 2.13    | <b>0.03</b> |
|                          | IJI      | 0.37        | 0.14 | 2.59    | <b>0.01</b> |
|                          | PR       | 0.13        | 0.14 | 0.94    | 0.34        |
| <i>M. fissipes</i>       | ENN_MN   | -0.22       | 0.14 | 1.45    | 0.14        |
|                          | IJI      | 0.19        | 0.15 | 1.23    | 0.21        |
|                          | CONNECT  | -0.19       | 0.15 | 1.24    | 0.21        |
|                          | PR       | 0.15        | 0.15 | 0.96    | 0.33        |
|                          | SHEI     | 0.16        | 0.15 | 1.04    | 0.29        |
| <i>B. gargarizans</i>    | PR       | 0.38        | 0.14 | 2.72    | <b>0.01</b> |
| <i>P. plancyi</i>        | CONNECT  | 0.26        | 0.14 | 1.78    | 0.07        |
|                          | SHEI     | 0.30        | 0.14 | 2.02    | <b>0.04</b> |
|                          | IJI      | 0.25        | 0.14 | 1072.00 | 0.08        |
|                          | PR       | 0.12        | 0.14 | 0.79    | 0.42        |
| Total anuran abundance   | IJI      | 0.38        | 0.13 | 2.46    | <b>0.00</b> |
|                          | PR       | 0.26        | 0.14 | 1.87    | 0.06        |
|                          | ENN_MN   | 0.11        | 0.13 | 0.81    | 0.41        |
| Anuran species richness  | IJI      | 0.04        | 0.15 | 2.49    | <b>0.01</b> |
|                          | PR       | 0.26        | 0.14 | 1.81    | 0.06        |
|                          | SHEI     | -0.20       | 0.17 | 1.18    | 0.23        |
| 1000m                    |          |             |      |         |             |
| <i>P. nigromaculatus</i> | AREA_MN  | 0.29        | 0.15 | 1.79    | 0.07        |
|                          | IJI      | 0.24        | 0.15 | 1.51    | 0.13        |
|                          | PR       | 0.36        | 0.17 | 2.09    | <b>0.03</b> |
| <i>F. multistriata</i>   | AREA_MN  | 0.45        | 0.14 | 2.95    | <b>0.00</b> |
|                          | IJI      | 0.41        | 0.15 | 2.67    | <b>0.00</b> |
|                          | PR       | 0.31        | 0.15 | 2.00    | <b>0.04</b> |
| <i>M. fissipes</i>       | PD       | 0.21        | 0.14 | 1.32    | 0.18        |
|                          | IJI      | 0.20        | 0.16 | 1.19    | 0.23        |
|                          | PR       | 0.16        | 0.16 | 0.10    | 0.33        |
|                          | LPI      | -0.17       | 0.16 | 1.09    | 0.26        |
|                          | AREA_MN  | -0.13       | 0.15 | 0.86    | 0.38        |
| <i>B. gargarizans</i>    | PR       | 0.34        | 0.14 | 2.76    | <b>0.00</b> |
| <i>P. plancyi</i>        | IJI      | 0.25        | 0.14 | 1.72    | 0.09        |
| Total anuran abundance   | AREA_MN  | 0.29        | 0.14 | 2.01    | <b>0.04</b> |
|                          | IJI      | 0.43        | 0.14 | 2.88    | <b>0.00</b> |
|                          | PR       | 0.30        | 0.15 | 1.87    | 0.06        |
| Anuran species richness  | IJI      | 0.36        | 0.15 | 2.28    | <b>0.02</b> |
|                          | PR       | 0.26        | 0.15 | 1.69    | 0.08        |
| 1500m                    |          |             |      |         |             |
| <i>P. nigromaculatus</i> | AREA_MN  | 0.27        | 0.15 | 1.73    | 0.05        |

|                          |         |       |      |       |             |
|--------------------------|---------|-------|------|-------|-------------|
|                          | PR      | 0.36  | 0.17 | 2.05  | <b>0.03</b> |
|                          | IJI     | 0.24  | 0.16 | 1.42  | 0.15        |
|                          | LPI     | -0.17 | 0.15 | 1.06  | 0.28        |
|                          | AREA_MN | 0.51  | 0.13 | 3.16  | <b>0.00</b> |
|                          | LPI     | -0.23 | 0.14 | 1.59  | 0.11        |
|                          | PR      | 0.49  | 0.15 | 3.19  | <b>0.00</b> |
|                          | IJI     | 0.23  | 0.15 | 1.43  | 0.15        |
|                          | PD      | 0.29  | 0.15 | 1.76  | 0.07        |
|                          | IJI     | 0.23  | 0.16 | 1.40  | 0.16        |
|                          | PD      | 0.30  | 0.15 | 1.29  | 0.19        |
| <i>F. multistriata</i>   | PR      | 0.45  | 0.13 | 3.18  | <b>0.00</b> |
|                          | LPI     | -0.99 | 0.14 | 0.66  | 0.51        |
|                          | LPI     | -0.13 | 0.16 | 1.46  | 0.14        |
|                          | IJI     | 0.11  | 0.16 | 1.36  | 0.17        |
| <i>M. fissipes</i>       | PD      | 0.29  | 0.15 | 1.76  | 0.07        |
|                          | IJI     | 0.23  | 0.16 | 1.40  | 0.16        |
|                          | PR      | 0.45  | 0.13 | 3.18  | <b>0.00</b> |
|                          | LPI     | -0.99 | 0.14 | 0.66  | 0.51        |
| <i>B. gargarizans</i>    | LPI     | -0.13 | 0.16 | 1.46  | 0.14        |
|                          | IJI     | 0.11  | 0.16 | 1.36  | 0.17        |
|                          | PD      | 0.30  | 0.15 | 1.29  | 0.19        |
|                          | PD      | 0.30  | 0.15 | 1.29  | 0.19        |
| <i>P. plancyi</i>        | AREA_MN | 0.27  | 0.14 | 1.85  | 0.06        |
|                          | LPI     | -0.30 | 0.16 | 1.76  | 0.07        |
|                          | PR      | 0.31  | 0.16 | 1.90  | 0.06        |
|                          | IJI     | 0.36  | 0.17 | 1.98  | <b>0.04</b> |
| Total anuran abundance   | IJI     | 0.44  | 0.14 | 2.88  | <b>0.00</b> |
|                          | PR      | 0.17  | 0.15 | 1.11  | 0.26        |
|                          | PR      | 0.17  | 0.15 | 1.11  | 0.26        |
|                          | PR      | 0.17  | 0.15 | 1.11  | 0.26        |
| Anuran species richness  | IJI     | 0.44  | 0.14 | 2.88  | <b>0.00</b> |
|                          | PR      | 0.17  | 0.15 | 1.11  | 0.26        |
|                          | PR      | 0.17  | 0.15 | 1.11  | 0.26        |
|                          | PR      | 0.17  | 0.15 | 1.11  | 0.26        |
| 2000m                    |         |       |      |       |             |
| <i>P. nigromaculatus</i> | PR      | 0.32  | 0.14 | 2.08  | <b>0.03</b> |
|                          | LPI     | -0.24 | 0.15 | 1.51  | 0.12        |
|                          | IJI     | 0.17  | 0.15 | 1.14  | 0.25        |
|                          | PD      | -0.20 | 0.16 | 1.19  | 0.23        |
|                          | CONNECT | 0.18  | 0.15 | 1.11  | 0.26        |
| <i>F. multistriata</i>   | CONNECT | 0.55  | 0.13 | 4.18  | <b>0.00</b> |
|                          | LPI     | -0.46 | 0.13 | -3.47 | <b>0.00</b> |
|                          | PR      | 0.31  | 0.12 | 2.56  | <b>0.01</b> |
|                          | PR      | 0.31  | 0.12 | 2.56  | <b>0.01</b> |
| <i>M. fissipes</i>       | PD      | 0.28  | 0.15 | 1.75  | 0.07        |
|                          | IJI     | 0.25  | 0.15 | 1.56  | 0.11        |
|                          | LPI     | -0.13 | 0.15 | 0.76  | 0.44        |
|                          | LPI     | -0.13 | 0.15 | 0.76  | 0.44        |
| <i>B. gargarizans</i>    | PR      | 0.43  | 0.14 | 2.98  | <b>0.00</b> |
|                          | LPI     | -0.12 | 0.13 | 0.84  | 0.39        |
|                          | IJI     | 0.12  | 0.14 | 0.83  | 0.40        |
|                          | IJI     | 0.12  | 0.14 | 0.83  | 0.40        |
| <i>P. plancyi</i>        | LPI     | -0.38 | 0.14 | -2.68 | <b>0.01</b> |
|                          | LPI     | -0.38 | 0.14 | -2.68 | <b>0.01</b> |
|                          | LPI     | -0.38 | 0.14 | -2.68 | <b>0.01</b> |
|                          | LPI     | -0.38 | 0.14 | -2.68 | <b>0.01</b> |
| Total anuran abundance   | CONNECT | 0.26  | 0.14 | 1.79  | 0.07        |
|                          | LPI     | -0.46 | 0.18 | 2.42  | <b>0.01</b> |
|                          | PR      | 0.23  | 0.13 | 1.71  | 0.08        |
|                          | IJI     | 0.26  | 0.16 | 1.53  | 0.12        |
| Anuran species richness  | IJI     | 0.43  | 0.14 | 2.94  | <b>0.00</b> |
|                          | PR      | 0.17  | 0.14 | 1.16  | 0.24        |
|                          | PD      | 0.96  | 0.14 | 0.63  | 0.52        |
|                          | PD      | 0.96  | 0.14 | 0.63  | 0.52        |
